# Supplementary material for: Enhanced Immunomodulation, Anti-Apoptosis, and Improved Tear Dynamics of (PEG)-BHD1028, a Novel Adiponectin Receptor Agonist Peptide, for Treating Dry Eye Disease
Source: MDPI journal article supplement (doi:10.3390/pharmaceutics15010078), 2022-12-26
Supplement: s1 [file s1]

# Supplementary Materials: Enhanced Immunomodulation, Anti-apoptosis, and Improved Tear Dynamics of (PEG)-BHD1028, a Novel Adiponectin Receptor Agonist Peptide, for Treating Dry Eye Disease

In-Kyung Lee <sup>1</sup>, Kyung-Chul Yoon <sup>2</sup>, Seong-Soo Kang <sup>3</sup>, Su-Kyung Seon <sup>3</sup>, Kwanghyun Lee <sup>4</sup> and Brian B Kim <sup>1,\*</sup>

**Table S1.** Mean value of diagnostic tests for each item group in mice (Mean ± SD).

| Mice model       | After inducing dry eye | EDE            | Vehicle (PBS)  | (PEG)-BHD1028  |               |               |
|------------------|------------------------|----------------|----------------|----------------|---------------|---------------|
|                  |                        |                |                | 0.001%         | 0.01%         | 0.1%          |
| Tear volume (μL) | Day 5                  | 0.019 ± 0.002  | 0.020 ± 0.004  | 0.024 ± 0.003  | 0.026 ± 0.003 | 0.028 ± 0.002 |
|                  | Day 10                 | 0.016 ± 0.002  | 0.018 ± 0.002  | 0.021 ± 0.002  | 0.027 ± 0.003 | 0.032 ± 0.004 |
| TBUT (sec)       | Day 5                  | 1.304 ± 0.086  | 1.324 ± 0.114  | 1.333 ± 0.081  | 1.406 ± 0.082 | 1.408 ± 0.095 |
|                  | Day 10                 | 1.193 ± 0.092  | 1.229 ± 0.060  | 1.359 ± 0.140  | 1.530 ± 0.137 | 1.483 ± 0.113 |
| CFS (score)      | Day 5                  | 10.875 ± 2.357 | 10.250 ± 2.435 | 9.875 ± 1.808  | 8.625 ± 1.598 | 8.125 ± 1.553 |
|                  | Day 10                 | 12.375 ± 1.923 | 12.625 ± 1.302 | 11.000 ± 1.927 | 7.625 ± 1.598 | 8.375 ± 1.302 |

**Table S2.** Mean value of diagnostic tests for each item group in rabbits (Mean ± SE).

| Rabbit model | After inducing dry eye | Vehicle      | (PEG)-BHD1028 |              |              | Cyclosporine 0.05% |
|--------------|------------------------|--------------|---------------|--------------|--------------|--------------------|
|              |                        |              | 0.1%          | 0.2%         | 0.4%         |                    |
| STT-2 (mm)   | Baseline               | 9.83 ± 1.74  | 6.67 ± 0.96   | 8.50 ± 1.39  | 9.17 ± 1.23  | 8.33 ± 0.38        |
|              | Day 0(EDE)             | 2.67 ± 1.10  | 3.00 ± 1.22   | 3.33 ± 1.28  | 3.33 ± 1.22  | 2.50 ± 1.10        |
|              | Day 5                  | 1.17 ± 0.50  | 4.67 ± 0.65   | 3.33 ± 0.51  | 4.33 ± 0.45  | 4.17 ± 0.37        |
|              | Day 10                 | 2.17 ± 0.64  | 6.50 ± 0.87   | 7.50 ± 0.99  | 6.67 ± 1.02  | 4.33 ± 0.45        |
| TBUT (sec)   | Baseline               | 48.33 ± 3.88 | 49.67 ± 3.17  | 49.83 ± 2.10 | 53.00 ± 2.29 | 52.00 ± 2.25       |
|              | Day 0(EDE)             | 8.20 ± 0.51  | 8.50 ± 1.0    | 8.89 ± 1.34  | 8.22 ± 1.16  | 8.92 ± 1.34        |
|              | Day 5                  | 8.81 ± 1.20  | 10.64 ± 0.99  | 15.68 ± 1.58 | 19.88 ± 1.42 | 11.19 ± 1.17       |
|              | Day 10                 | 10.22 ± 1.97 | 17.88 ± 1.91  | 17.72 ± 1.74 | 22.71 ± 1.87 | 11.49 ± 2.23       |
| CSS (score)  | Baseline               | 0.33 ± 0.19  | 0.00 ± 0.00   | 0.00 ± 0.00  | 0.00 ± 0.00  | 0.17 ± 0.15        |
|              | Day 0(EDE)             | 8.75 ± 0.46  | 6.67 ± 0.30   | 9.17 ± 0.37  | 8.00 ± 0.62  | 6.05 ± 1.20        |
|              | Day 5                  | 8.50 ± 0.89  | 7.17 ± 1.21   | 6.83 ± 0.64  | 5.67 ± 0.38  | 5.67 ± 0.81        |
|              | Day 10                 | 12.50 ± 1.24 | 6.67 ± 0.56   | 6.17 ± 0.55  | 3.83 ± 0.64  | 6.17 ± 1.04        |

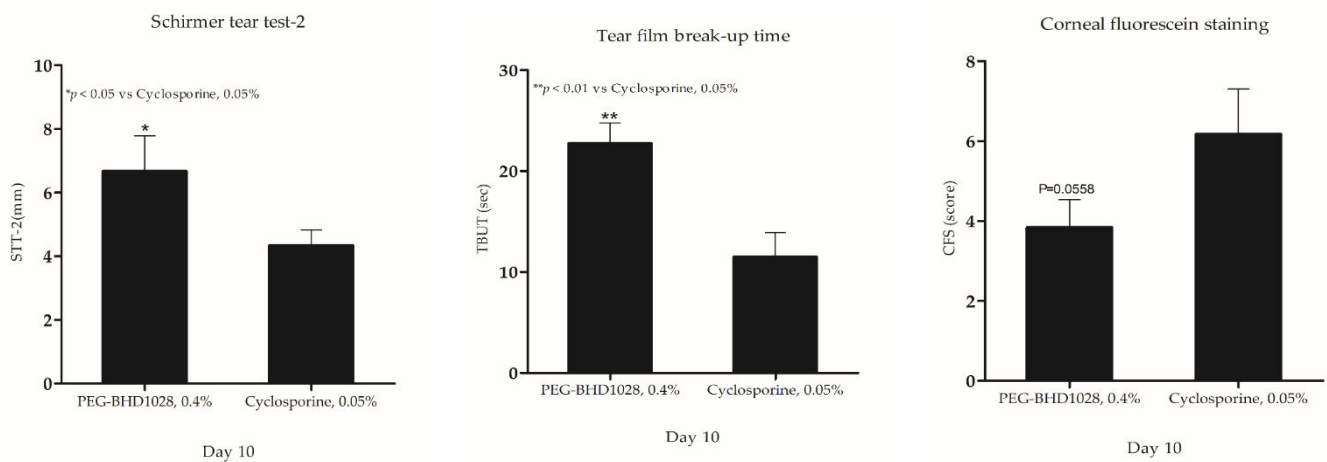

**Figure S1.** The results were expressed as means  $\pm$  S.E.M. and were considered significant when  $p < 0.05$ . Statistical analysis was performed using Student's t-test by the computer program Prism (GraphPad Software, USA). Results are presented as means  $\pm$  SEM ( $n = 6$ ). \*\*  $p < 0.01$  and \*  $p < 0.05$  vs positive control.

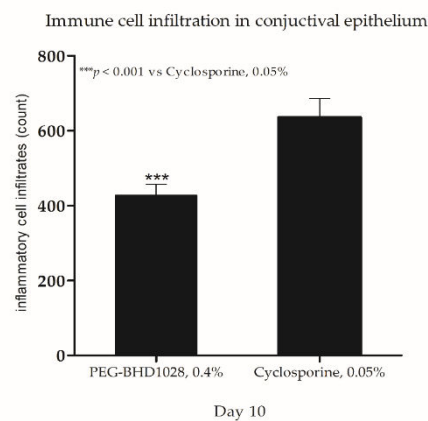

**Figure S2.** The results were expressed as means  $\pm$  S.E.M. and were considered significant when  $p < 0.05$ . Statistical analysis was performed using Student's t-test by the computer program Prism (GraphPad Software, USA). Results are presented as means  $\pm$  SEM ( $n = 6$ ). \*\*\*  $p < 0.001$  vs positive control.

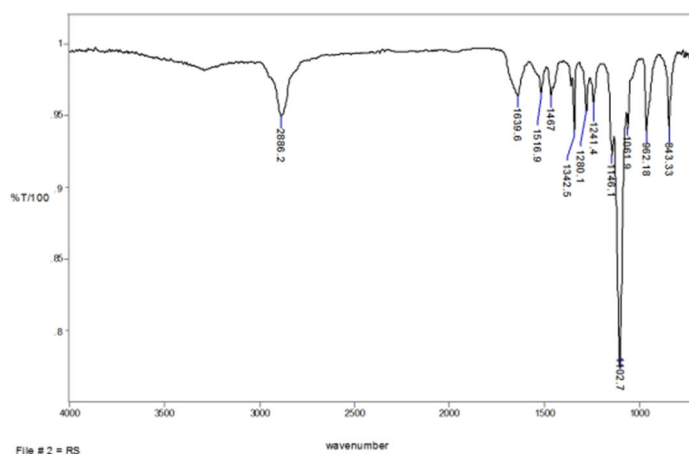

File # 2 = RS

wavenumber

Figure S3. The conformational analysis of (PEG)-BHD1028 using Fourier transform IR (FT-IR) spectroscopy.

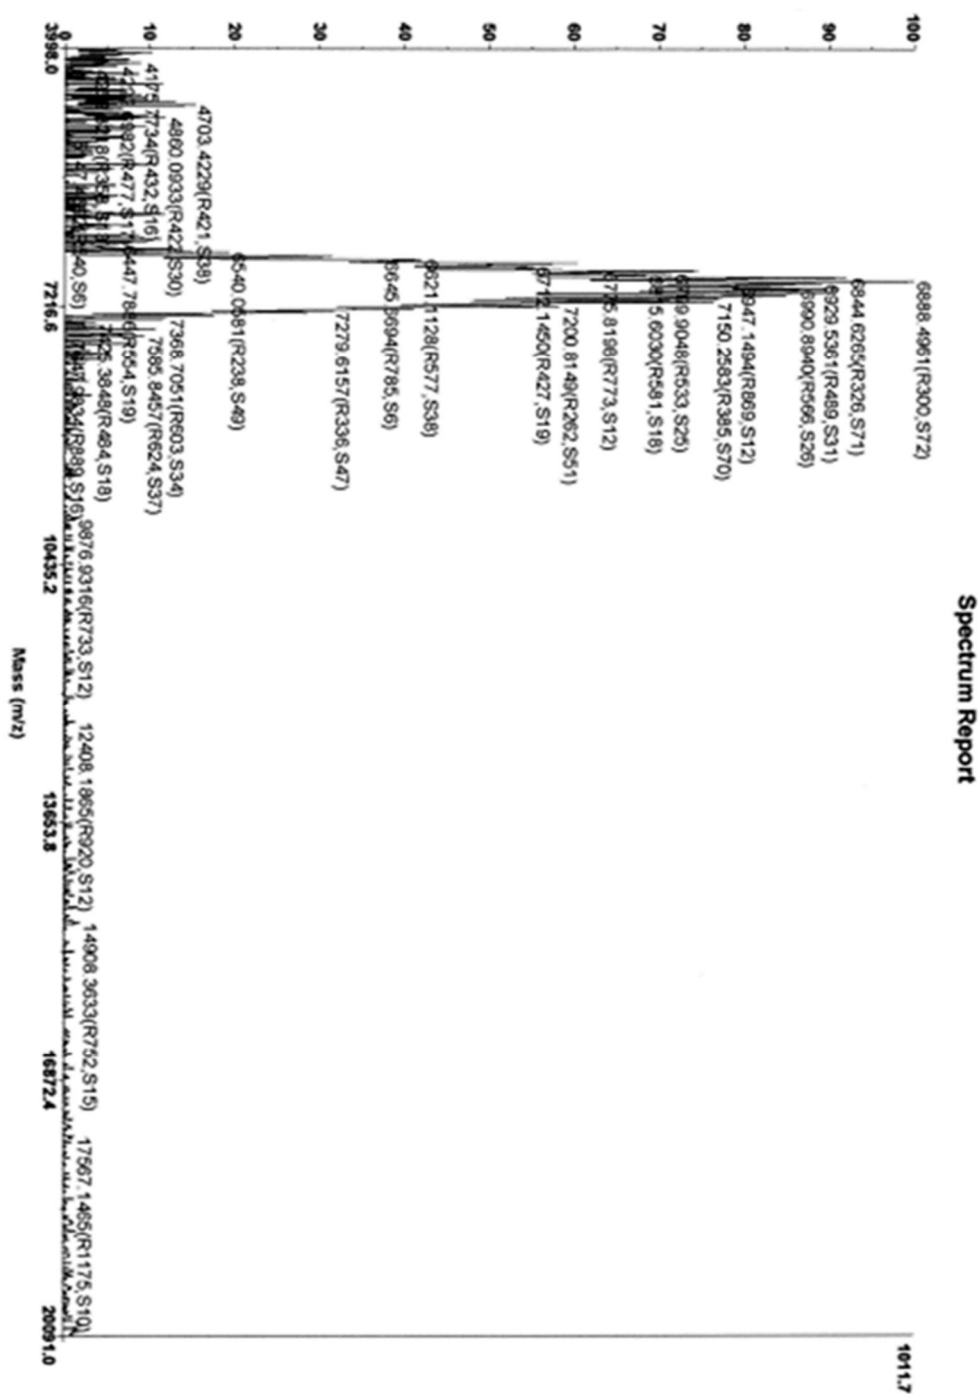

Figure S4. The identification of (PEG)-BHD1028 by MALDI-TOF mass spectrometry.
